# Supplementary material for: Dysregulation of Resolvin E1 Metabolism and Signaling in a Light-Damage Model of Age-Related Macular Degeneration
Source: Int J Mol Sci. 2023 Apr 4;24(7):6749. doi: 10.3390/ijms24076749 (PMC10095591; doi:10.3390/ijms24076749)
Supplement: Supplementary file 1 [file ijms-24-06749-s001.zip › ijms-2269410-supplementary.pdf]

## Supplementary material

### Dysregulation of resolvin E1 metabolism and signaling in a light-damage model of age-related macular degeneration

Annamaria Tisi<sup>1</sup>, Giulia Carozza<sup>1</sup>, Alessandro Leuti<sup>2,3</sup>, Rita Maccarone<sup>1,\*</sup> and Mauro Maccarrone<sup>1,3,\*</sup>

<sup>1</sup> Department of Biotechnological and Applied Clinical Sciences, University of L'Aquila, 67100 L'Aquila, Italy

<sup>2</sup> Department of Medicine, Campus Bio-Medico University of Rome, 00128 Rome, Italy

<sup>3</sup> European Center for Brain Research (CERC)/Santa Lucia Foundation IRCCS, 00143 Rome, Italy

\* Corresponding authors: rita.maccarone@univaq.it; mauro.maccarrone@univaq.it

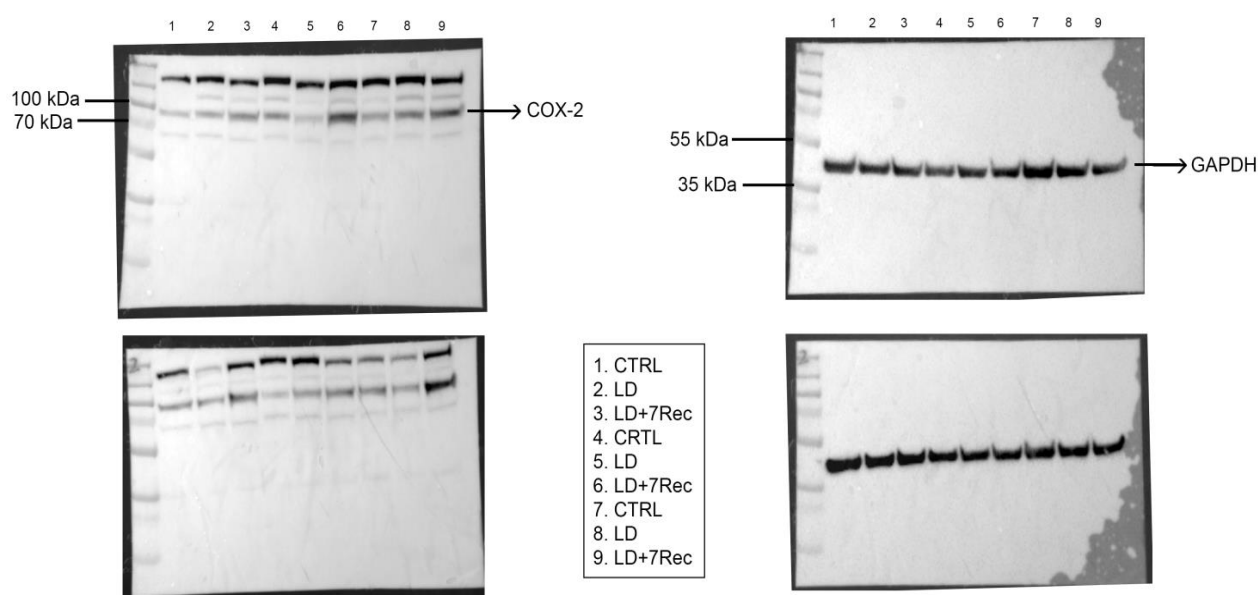

**Supplementary Figure S1.** Whole Western blots of COX-2 and GAPDH. Each band represents a biological replicate.

Supplementary material

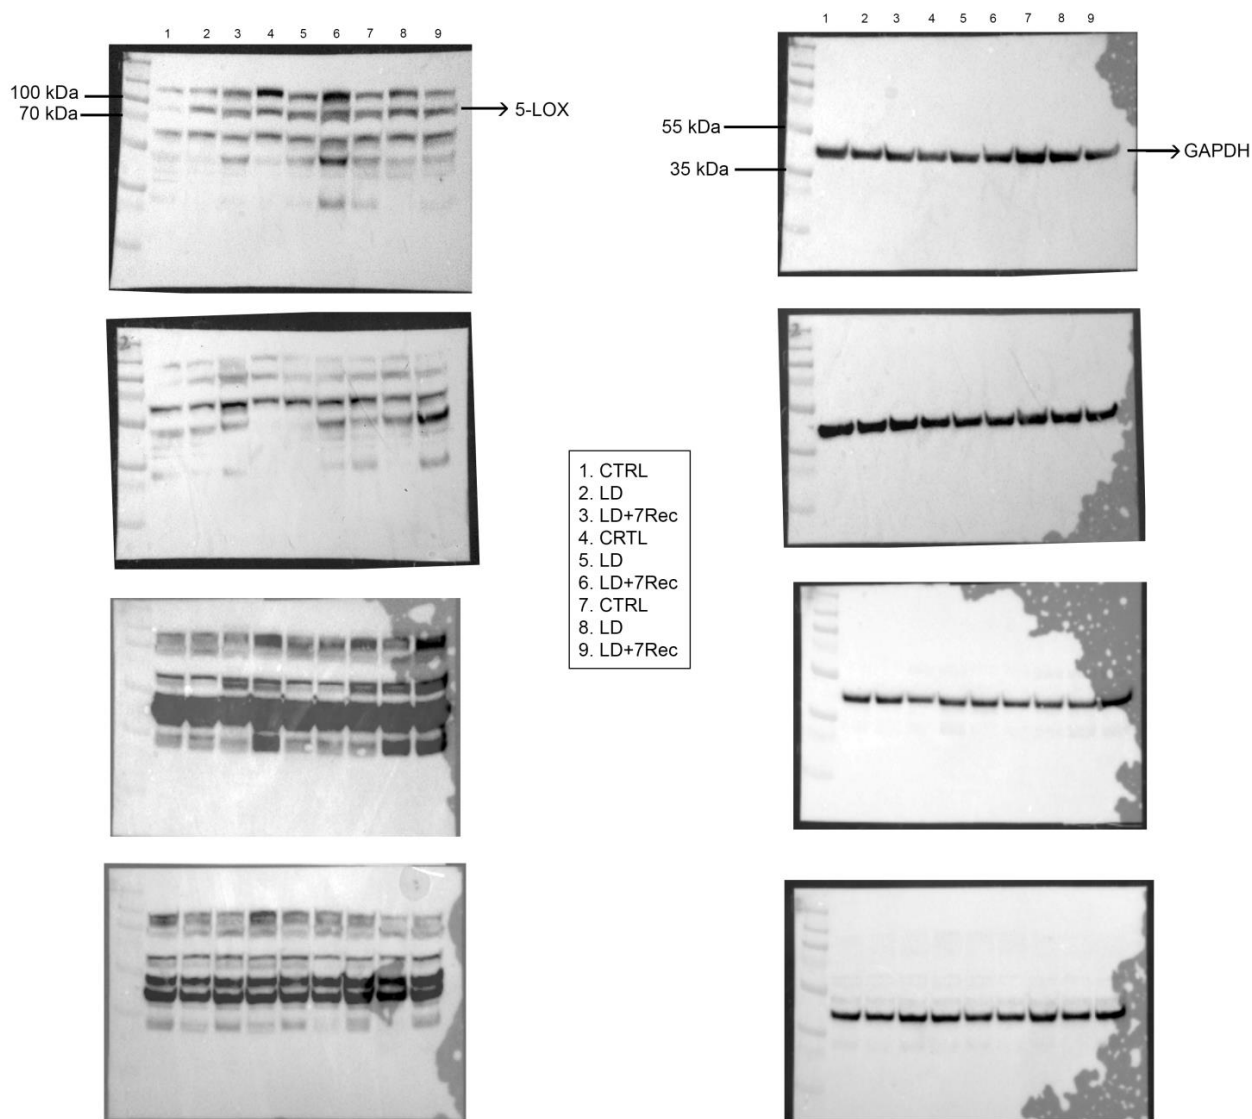

**Supplementary Figure S2.** Whole Western blots of 5-LOX and GAPDH. Each band represents a biological replicate.

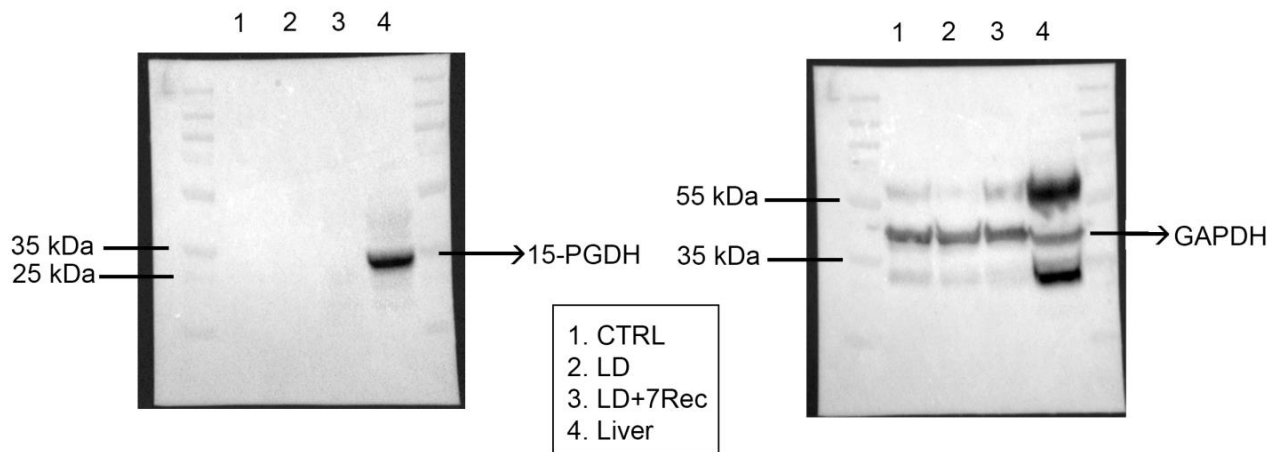

Supplementary material

Supplementary Figure S3. Whole Western blots of 15-PGDH and GAPDH.

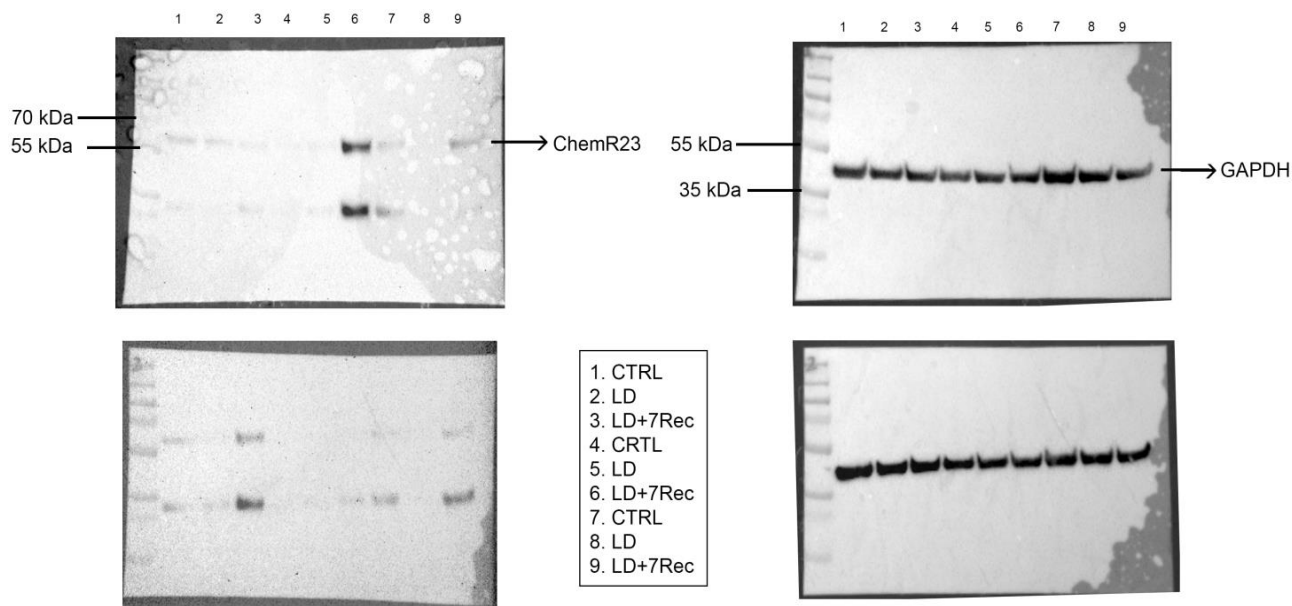

Supplementary Figure S4. Whole Western blots of ChemR23 and GAPDH. Each band represents a biological replicate.

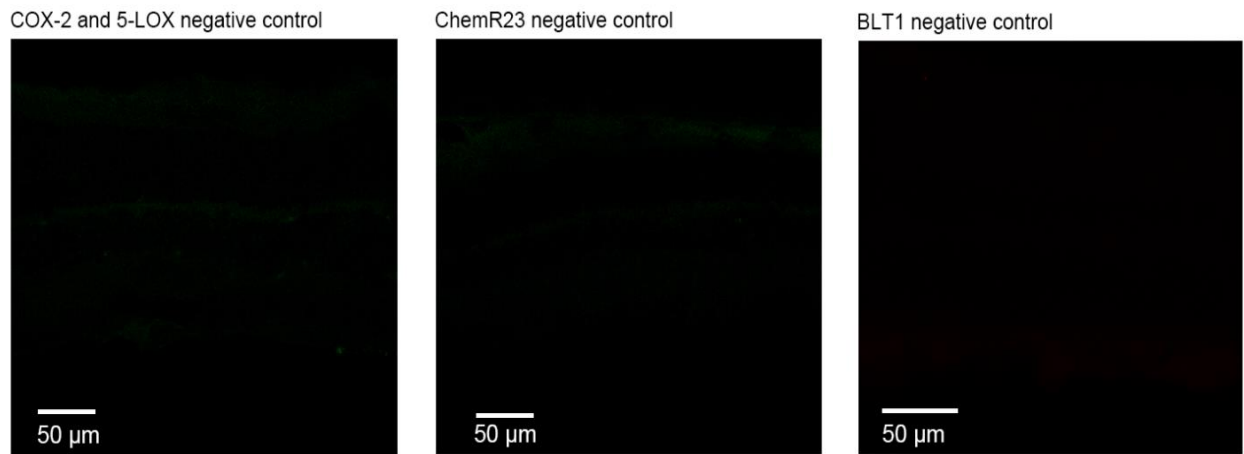

Supplementary Figure S5. Negative controls of anti-COX-2, -5-LOX, -ChemR23, and -BLT1 immunostainings. The negative control of COX-2 and 5-LOX, based on the same protocol, included the anti-mouse 488 conjugated secondary antibody. Scale bars: 50  $\mu\text{m}$ .

Supplementary material

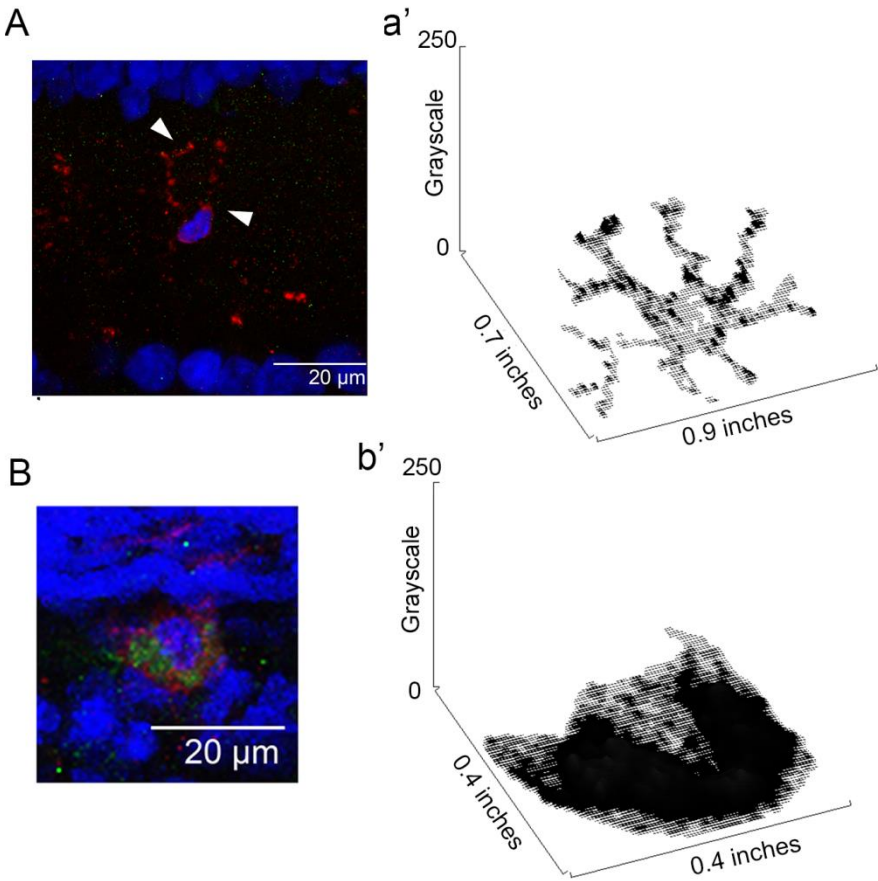

**Supplementary Figure S6.** Surface plot profiles of ChemR23 fluorescence in microglia. (A) Resting microglia and (a') its surface plot; (B) activated microglia and (b') its surface plot. ChemR23 fluorescence intensity in microglia expressed as grayscale (0-250). Green: ChemR23; Red: IBA-1; Blue: Hoechst.

**Supplementary Table S1.** Summary of the primary antibodies used in the study.

| Antibody | Species | Company, #Catalog      | Use (IF/WB) | Dilution       |
|----------|---------|------------------------|-------------|----------------|
| COX-2    | Rabbit  | Abcam, #ab62331        | WB          | 1:1000         |
| COX-2    | Mouse   | Santa Cruz, #sc-376861 | IF          | 1:50           |
| 5-LOX    | Mouse   | Santa Cruz, #sc-136195 | WB<br>IF    | 1:200<br>1:100 |
| ChemR23  | Mouse   | Santa Cruz, #sc-398769 | WB<br>IF    | 1:50<br>1:50   |
| 15-PGDH  | Rabbit  | Abcam, #ab96732        | WB          | 1:500          |
| GAPDH    | Mouse   | Invitrogen, #am4300    | WB          | 1:3000         |
| BLT1     | Rabbit  | Abcam, #188886         | IF          | 1:100          |
| IBA-1    | Rabbit  | Wako, #019-19741       | IF          | 1:1000         |
